# Supplementary material
Source: ML conference proceedings conference paper supplement (https://openaccess.thecvf.com/content/ICCV2023/html/Zuo_DG3D_Generating_High_ICCV_2023_paper.html)
Supplement: Supplementary file 2 [file Zuo_DG3D_Generating_High_ICCV_2023_supplemental.zip]

Archive with 4 entries (4 files):
- demo5625.mp4
- __MACOSX/._demo5625.mp4
- sup.pdf
- __MACOSX/._sup.pdf
